# Supplementary material for: A seasonal analysis of aerosol NO 3 - sources and NO x oxidation pathways in the Southern Ocean marine boundary layer
Source: Copernicus journal article supplement (doi:10.5194/acp-2022-704), 2022-11-16
Supplement: Supplementary file 1 [file acp-2022-704-supplement.pdf]

# A seasonal analysis of aerosol NO<sub>3</sub><sup>-</sup> sources and NO<sub>x</sub> oxidation pathways in the Southern Ocean marine boundary layer

Jessica M. Burger<sup>1</sup>, Emily Joyce<sup>2</sup>, Meredith G. Hastings<sup>2</sup>, Kurt A. M. Spence<sup>1</sup>, Katy E. Altieri<sup>1</sup>

<sup>1</sup>Department of Oceanography, University of Cape Town, Rondebosch, 7701, South Africa

<sup>2</sup>Department of Earth, Environmental and Planetary Sciences and Institute at Brown for Environment and Society, Brown University, Providence, RI, 02906, USA.

Correspondence to: Jessica M. Burger ([brgjes006@uct.ac.za](mailto:brgjes006@uct.ac.za))

## Supplemental material

Table S1. The start and end date of each filter deployment, as well as the latitude (° N) and Longitude (° E) at the start and end of each filter deployment are presented. The duration (hr) of each filter deployment and the number of daylight hours experienced during each filter deployment is also included, and samples are separated by season (Winter, Spring and Summer) and by transect (Southbound, Northbound or Ice edge).

| Season | Sample | Transect                | Start date<br>(yyyy/mm/dd) | End date<br>(yyyy/mm/dd) | Latitude<br>(° N) |       | Longitude<br>(° E) |      | Duration<br>(hr) | Daylight<br>(hr) |
|--------|--------|-------------------------|----------------------------|--------------------------|-------------------|-------|--------------------|------|------------------|------------------|
|        |        |                         |                            |                          | Start             | End   | Start              | End  |                  |                  |
| Winter | 1      | Southbound              | 2019/07/19                 | 2019/07/20               | -35.6             | -39.0 | 16.4               | 12.9 | 24.5             | 9.9              |
| Winter | 2      | Southbound              | 2019/07/20                 | 2019/07/22               | -39.4             | -46.3 | 12.5               | 6.2  | 30.2             | 9.5              |
| Winter | 3      | Southbound              | 2019/07/23                 | 2019/07/24               | -50.9             | -54.5 | 2.6                | -0.3 | 20.3             | 8.4              |
| Winter | 4      | Northbound              | 2019/07/28                 | 2019/07/30               | -56.4             | -52.7 | 0.6                | -1.7 | 29.8             | 8.4              |
| Winter | 5      | Northbound              | 2019/08/02                 | 2019/08/03               | -45.0             | -42.5 | 6.6                | 8.9  | 19.5             | 9.8              |
| Winter | 6      | Northbound              | 2019/08/03                 | 2019/08/05               | -42.3             | -36.3 | 9.1                | 13.3 | 21.9             | 10.2             |
| Spring | 1      | Southbound              | 2019/10/13                 | 2019/10/14               | -35.8             | -38.8 | 14.9               | 11.7 | 24.4             | 13.0             |
| Spring | 2      | Southbound              | 2019/10/14                 | 2019/10/16               | -40.3             | -44.7 | 10.6               | 6.9  | 25.6             | 13.2             |
| Spring | 3      | Southbound              | 2019/10/16                 | 2019/10/17               | -44.9             | -48.4 | 6.7                | 4.2  | 23.7             | 13.5             |
| Spring | 4      | Southbound              | 2019/10/17                 | 2019/10/19               | -48.4             | -54.0 | 4.2                | 0.0  | 29.9             | 13.8             |
| Spring | 5      | Southbound              | 2019/10/19                 | 2019/10/20               | -54.0             | -55.0 | 0.0                | 0.2  | 17.1             | 14.1             |
| Spring | 6      | Southbound              | 2019/10/20                 | 2019/10/21               | -55.0             | -55.2 | 0.2                | 0.2  | 11.9             | 14.3             |
| Spring | 7      | Southbound/<br>Ice edge | 2019/10/21                 | 2019/10/23               | -55.2             |       | 0.2                |      | 29.5             | 14.3             |
| Spring | 8      | Ice edge                | 2019/10/23                 | 2019/10/24               |                   | -59.3 |                    | 0.0  | 20.3             | 15.0             |
| Spring | 9      | Ice edge                | 2019/10/24                 | 2019/10/26               | -59.3             | -59.1 | 0.0                | 1.0  | 17.7             | 15.0             |
| Spring | 10     | Ice edge                | 2019/10/26                 | 2019/10/28               | -58.9             | -59.3 | 1.2                | 6.6  | 17.5             | 15.2             |
| Spring | 11     | Ice edge                | 2019/10/28                 | 2019/10/30               | -59.3             | -59.3 | 6.6                | 12.0 | 9.7              | 15.4             |
| Spring | 12     | Ice edge                | 2019/10/30                 | 2019/11/01               | -59.3             | -58.6 | 12.0               | 17.7 | 23.3             | 15.5             |
| Spring | 13     | Ice edge                | 2019/11/01                 | 2019/11/03               | -58.6             | -58.5 | 17.7               | 22.0 | 19.4             | 15.6             |
| Spring | 14     | Ice edge                | 2019/11/03                 | 2019/11/04               | -58.5             | -56.8 | 22.0               | 21.5 | 22.5             | 15.6             |
| Spring | 15     | Ice edge                | 2019/11/04                 | 2019/11/06               | -56.7             | -55.5 | 21.1               | 10.9 | 24.9             | 15.5             |
| Spring | 16     | Ice edge/<br>Northbound | 2019/11/06                 | 2019/11/08               | -55.5             | -56.1 | 10.9               | 0.8  | 33.5             | 15.6             |
| Spring | 17     | Northbound              | 2019/11/08                 | 2019/11/09               | -56.1             | -54.0 | 0.5                | 0.0  | 27.5             | 15.6             |
| Spring | 18     | Northbound              | 2019/11/10                 | 2019/11/12               | -51.4             | -47.0 | 0.0                | 4.5  | 40.6             | 15.0             |
| Spring | 19     | Northbound              | 2019/11/12                 | 2019/11/13               | -47.0             | -43.8 | 4.5                | 7.7  | 21.7             | 14.7             |
| Spring | 20     | Northbound              | 2019/11/13                 | 2019/11/14               | -43.7             | -44.7 | 7.9                | 6.9  | 24.0             | 14.6             |

|        |    |            |            |            |       |       |       |       |      |      |
|--------|----|------------|------------|------------|-------|-------|-------|-------|------|------|
| Spring | 21 | Northbound | 2019/11/14 | 2019/11/16 | -44.9 | -41.5 | 6.7   | 9.6   | 30.0 | 14.6 |
| Spring | 22 | Northbound | 2019/11/16 | 2019/11/18 | -41.5 | -36.3 | 9.6   | 13.3  | 25.4 | 14.3 |
| Spring | 23 | Northbound | 2019/11/18 | 2019/11/19 | -36.3 | -36.2 | 13.3  | 13.5  | 7.5  | 14.1 |
| Summer | 1  | Southbound | 2018/12/07 | 2018/12/08 | -34.5 | -37.0 | 14.8  | 12.7  | 13.8 | 14.5 |
| Summer | 2  | Southbound | 2018/12/08 | 2018/12/09 | -37.1 | -41.8 | 12.6  | 8.8   | 24.8 | 14.9 |
| Summer | 3  | Southbound | 2018/12/09 | 2018/12/10 | -41.8 | -44.1 | 8.8   | 6.8   | 13.5 | 15.3 |
| Summer | 4  | Southbound | 2018/12/10 | 2018/12/12 | -45.0 | -50.8 | 6.1   | 0.6   | 14.2 | 16.0 |
| Summer | 5  | Southbound | 2018/12/14 | 2018/12/16 | -59.7 | -68.3 | 0.0   | 0.0   | 15.6 | 21.3 |
| Summer | 6  | Southbound | 2018/12/16 | 2018/12/19 | -68.5 | -70.1 | 0.0   | -2.1  | 29.5 | 24   |
| Summer | 7  | Southbound | 2018/12/19 | 2018/12/21 | -70.1 | -70.2 | -2.1  | -2.1  | 27.1 | 24   |
| Summer | 8  | Northbound | 2019/02/27 | 2019/03/01 | -69.3 | -60.0 | -4.0  | -2.3  | 40.6 | 14.7 |
| Summer | 9  | Northbound | 2019/03/01 | 2019/03/03 | -60.0 | -59.5 | -2.8  | -26.1 | 38.8 | 13.9 |
| Summer | 10 | Northbound | 2019/03/03 | 2019/03/04 | -59.5 | -55.9 | -26.1 | -33.8 | 26.2 | 13.6 |
| Summer | 11 | Northbound | 2019/03/04 | 2019/03/10 | -55.8 | -49.5 | -34.0 | 4.1   | 33.1 | 13.1 |
| Summer | 12 | Northbound | 2019/03/10 | 2019/03/12 | -49.5 | -43.1 | 4.1   | 7.8   | 34.1 | 12.7 |
| Summer | 13 | Northbound | 2019/03/12 | 2019/03/13 | -43.1 | -36.3 | 7.8   | 13.3  | 34.9 | 12.5 |
| Summer | 14 | Northbound | 2019/03/13 | 2019/03/14 | -36.1 | -34.4 | 13.4  | 17.8  | 18.1 | 12.4 |

Table S2. Accepted reference values for  $\delta^{15}\text{N}$  vs.  $\text{N}_2$  in air and  $\delta^{18}\text{O}$  vs. VSMOW in ‰ for the calibration standards used.

| Standard              | IAEA-N3 | USGS34 | USGS35 | Citation            |
|-----------------------|---------|--------|--------|---------------------|
| $\delta^{15}\text{N}$ | 4.7     | -1.8   |        | Böhlke et al., 2003 |
| $\delta^{18}\text{O}$ | 25.6    | -27.9  | 57.5   | Böhlke et al., 2003 |

Table S3. The pooled standard deviation in ‰ and samples size (1 SD<sub>p</sub>; n = x) for repeated measurements of reference standards in summer and winter & spring.

| Season          | Standard              | IAEA-N3      | USGS34       | USGS35       |
|-----------------|-----------------------|--------------|--------------|--------------|
| winter & spring | $\delta^{15}\text{N}$ | 0.32; n = 19 | 0.16; n = 19 |              |
|                 | $\delta^{18}\text{O}$ | 0.26; n = 19 | 0.64; n = 19 | 0.52, n = 19 |

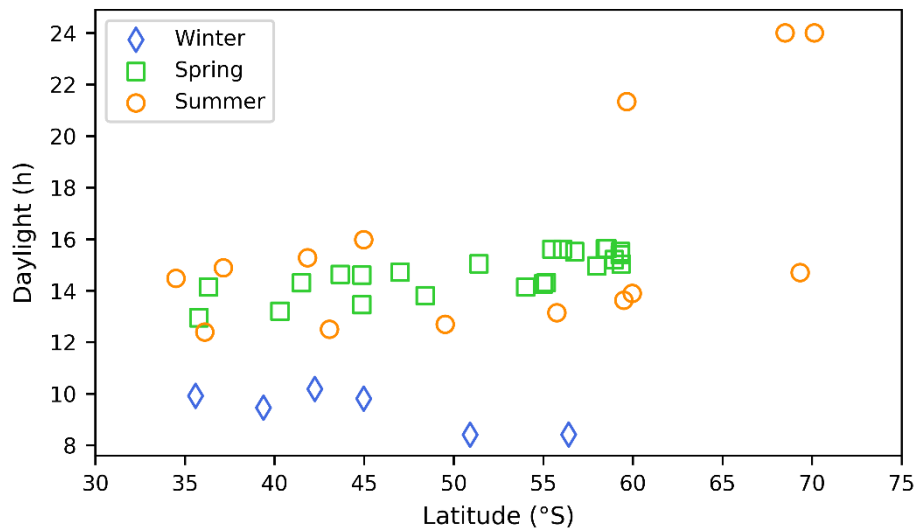

Figure S1. The number of daylight hours (h) available during each filter deployment in winter (blue diamonds), spring (green squares) and summer (orange circles), with latitude (° S).

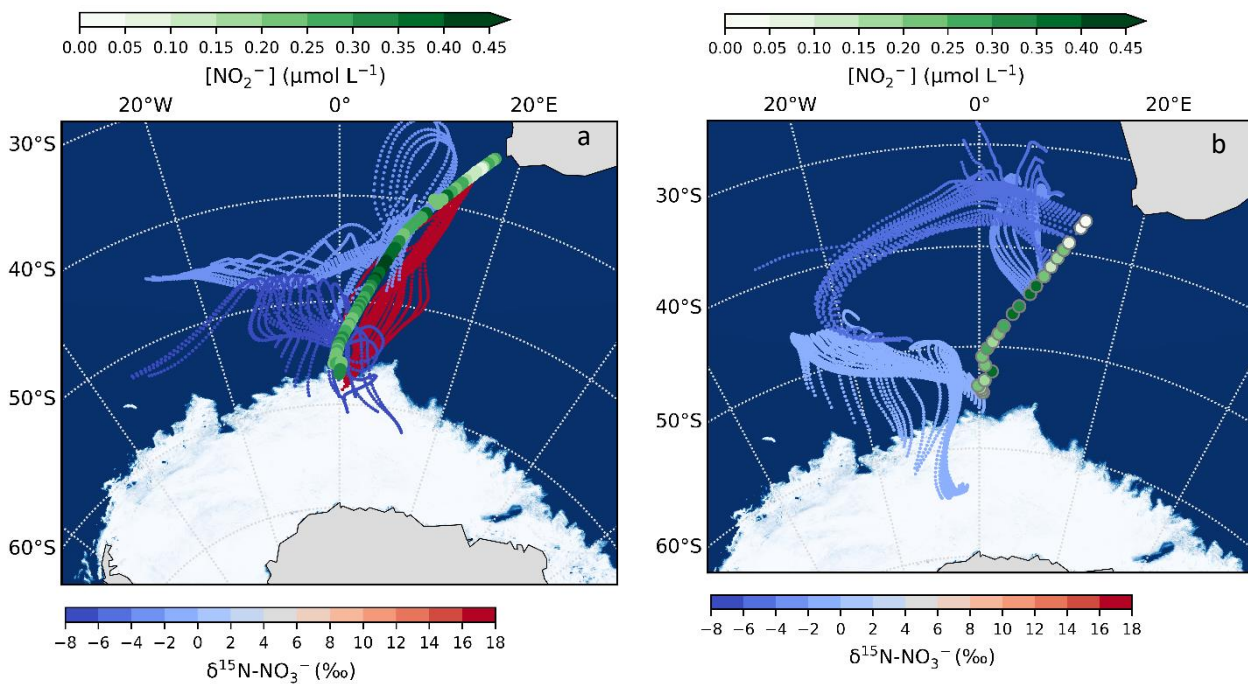

Figure S2. 72-hour AMBTs computed for each hour of the winter cruise during the southbound leg (a), the northbound leg (b) when the HV-AS was running for more than 45 min of the hour. AMBTs are colour coded by the weighted average  $\delta^{15}\text{N-NO}_3^-$ , represented by the blue to red colour bar. Overlaid are the surface ocean nitrite concentrations ( $[\text{NO}_2^-]$ ), represented by the green colour bar. The white area represents the location of the sea ice determined using satellite-derived sea ice concentration data obtained from the passive microwave sensors ASMR2 (Advanced Microwave Scanning Radiometer2; Spreen et al., 2008).

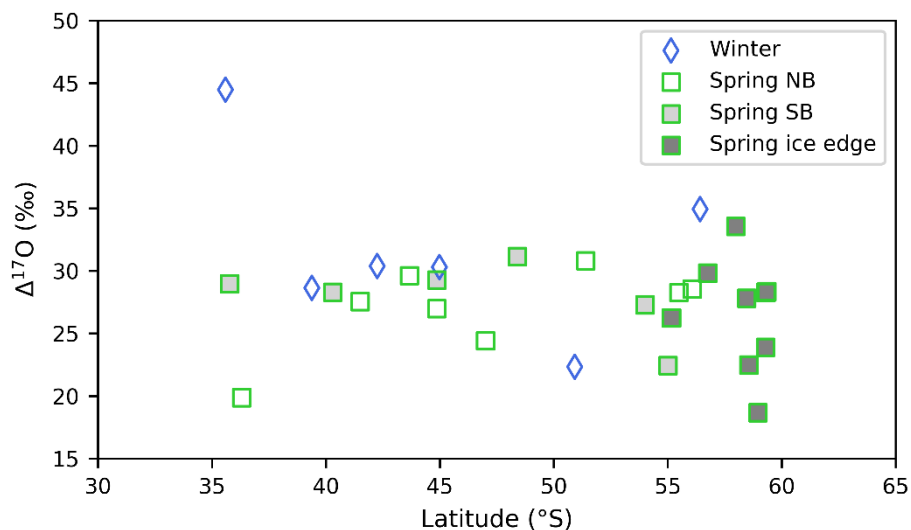

Figure S3. The weighted average  $\Delta^{17}\text{O}$  of atmospheric nitrate ( $\Delta^{17}\text{O}\text{-NO}_3^-$  (‰)) as a function of latitude ( $^\circ\text{S}$ ). Winter and spring are denoted by blue diamonds and green squares, respectively. Spring data are separated into northbound (NB), southbound (SB) and ice edge legs by clear, light grey and dark grey fills, respectively.

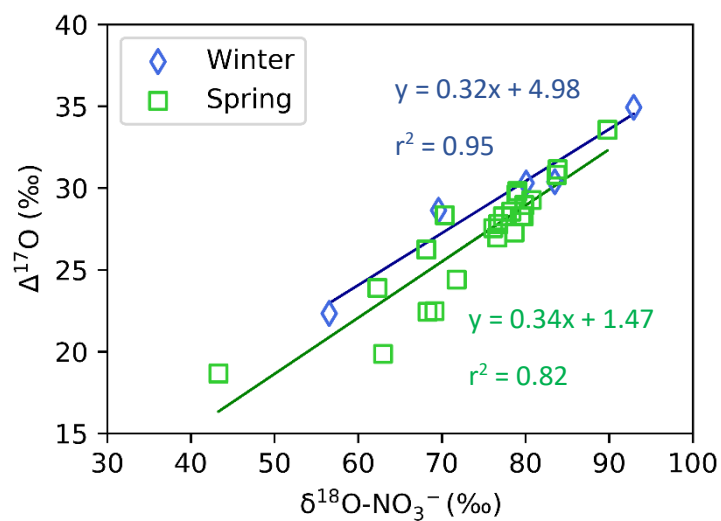

Figure S4. The correlation between atmospheric  $\delta^{18}\text{O}\text{-NO}_3^-$  and  $\Delta^{17}\text{O}\text{-NO}_3^-$  in winter (blue diamonds) and spring (green squares). The best fit equations and coefficients of determination ( $R^2$ ) for  $\delta^{18}\text{O}\text{-NO}_3^-$  vs.  $\Delta^{17}\text{O}\text{-NO}_3^-$  are shown.
